# Supplementary material for: Tissue-specific evaluation of suitable reference genes for RT-qPCR in the pond snail, Lymnaea stagnalis
Source: PeerJ. 2019 Oct 15;7:e7888. doi: 10.7717/peerj.7888 (PMC6798871; doi:10.7717/peerj.7888)
Supplement: Supplemental Information 4 — Reactions were performed in triplicate for each gene and each tissue. For this dataset, 500 ng of RNA was used in the reverse transcription reaction prior to qPCR. [file peerj-07-7888-s004.xlsx]

## Sheet: Sheet1
Tissue	Replicate	ACTB	EF1α	GAPDH	Rapac1	TUBB	UBI	VGKC
CNS	1	22.9	22.45	24.04	30.8	19.07	18.14	33.25
CNS	1	21.23	20.93	22.8	29.3	17.3	16.58	31.7
CNS	1	21.05	20.83	22.76	29.76	23.26	16.61	32.15
CNS	2	19.25	19.52	21	25.98	19.42	16.94	28.96
CNS	2	17.49	18.17	19.98	25.01	16.49	16.24	27.83
CNS	2	17.39	17.93	19.55	24.55	16.2	16.02	27.61
CNS	3	18.68	19.3	20.66	25.71	19.49	16.96	28.2
CNS	3	17.31	18.13	19.31	24.76	16.34	16.42	26.39
CNS	3	18.1	18.19	19.83	25.43	17.1	16.54	27.34
Tentacles	1	18.62	19.81	21.33	27.42	19.18	17.49	30.46
Tentacles	1	17.08	18.61	19.98	26.52	17.33	16.11	28.45
Tentacles	1	16.95	18.36	19.75	26.49	17.15	16.09	28.72
Tentacles	2	17.41	18.76	20.66	26.91	17.75	16.92	29.37
Tentacles	2	17.11	17.79	19.88	26.36	16.99	15.96	28.51
Tentacles	2	17.01	17.62	19.74	25.75	16.49	15.89	28.2
Tentacles	3	18.29	19.1	20.65	29.38	19.03	16.92	29.01
Tentacles	3	16.98	18.09	19.3	28.34	18.63	16.01	28.25
Tentacles	3	17.32	18.37	19.93	29.11	19.34	16.26	28.75
Lips	1	19.19	19.73	21.44	27.48	18.49	18.06	30.52
Lips	1	17.77	18.78	20.57	26.34	17.55	17.15	29.54
Lips	1	17.8	18.87	20.43	26.89	17.53	17.02	29.16
Lips	2	18.72	20.54	21.59	27.29	18.38	18.3	29.45
Lips	2	17.35	18.92	20.63	26.28	18.73	16.18	28.13
Lips	2	17.48	18.7	20.5	26.25	17.43	16.12	28.11
Lips	3	19.41	19.55	22.18	27.62	19.96	17.78	30.22
Lips	3	17.33	18.25	20.55	26.87	18.01	16.36	28.69
Lips	3	18.64	18.91	21.21	27.7	19.41	16.98	29.54
Penis	1	19.42	18.18	20.3	26.98	17.48	17.1	30.72
Penis	1	17.55	17.33	19.49	26.4	17.49	16.01	30.17
Penis	1	17.49	17.43	19.21	25.89	20.05	16.11	30.74
Penis	2	18.35	17.92	19.4	26.43	19.04	16.92	30.2
Penis	2	17.02	17.21	18.94	25.46	17.71	16.24	29.28
Penis	2	16.89	17.02	18.76	25.33	17.64	16.37	30.8
Penis	3	20.01	19.15	20.97	28.08	29.83	17.32	31.43
Penis	3	18.51	17.72	19.79	25.44	27.04	16.11	30.58
Penis	3	19.46	18.84	20.51	27.92	32.19	16.79	31.51
Mantle	1	19.1	20.1	20.21	26.12	23.21	17.1	30.92
Mantle	1	17	18.93	19.05	26.33	21.18	15.88	30.07
Mantle	1	16.89	18.93	18.94	26.94	21.8	15.91	30.2
Mantle	2	18.31	19.85	21.97	28.78	23.35	16.65	32.3
Mantle	2	17.24	18.62	20.86	27.1	22.48	15.93	31.37
Mantle	2	17.44	18.65	20.88	29.68	23.29	15.94	31.53
Mantle	3	18.44	19.01	21.3	28.09	22.68	16.8	31.16
Mantle	3	17.06	17.92	19.64	26.97	19.47	15.7	29.31
Mantle	3	17.59	18.16	20.87	28.09	21.98	16.26	30.14
Foot	1	20.38	21.09	22.07	28.04	19.55	18.14	31.37
Foot	1	18.61	20.29	21.09	27.23	19.02	17.05	30.4
Foot	1	18.79	20.22	21.26	26.94	18.73	17.14	30.48
Foot	2	19.11	19.46	21.47	25.74	19.45	16.9	30.82
Foot	2	17.33	18.24	20.15	24.37	18.08	16.05	29.67
Foot	2	17.55	18.29	20.16	24.54	18.65	16.13	29.95
Foot	3	17.68	18.39	19.12	25.64	18.29	16.7	30.95
Foot	3	16.58	17.07	18.29	24.44	17.44	16.02	30.31
Foot	3	16.67	17.13	18.34	24.58	17.54	16.1	30.35
