# Supplementary material for: Tissue-specific evaluation of suitable reference genes for RT-qPCR in the pond snail, Lymnaea stagnalis
Source: PeerJ. 2019 Oct 15;7:e7888. doi: 10.7717/peerj.7888 (PMC6798871; doi:10.7717/peerj.7888)
Supplement: Supplemental Information 5 — This is an additional dataset not referred to in the current version of the article. All raw Cq values for every qPCR reaction. Reactions were performed in triplicate for each gene and each tissue. For this dataset, 20 ng of RNA was used in the reverse transcription reaction prior to qPCR. [file peerj-07-7888-s005.xlsx]

## Sheet: Sheet1
Biological replicate	Tissue	EF1a	GAPDH	Actin	Tubulin	PRAP	UBI	KHCP
1	CNS	22.62	22.97	20.68	20.24	25.79	19.69	25.94
1	CNS	22.76	23.69	20.26		26.63	19.51	28.5
1	CNS	23.35	23.12	22.34	20.58	25.52	19.1	28.17
2	CNS	23.34	23.08	23.42	21.11	26.82	20.28	30.74
2	CNS	23.52	23.67	22.43	20.92	26.54	19.52	26.84
2	CNS	23.55	24.09	21.7	21.21	26.78	20.04	26.98
3	CNS	22.71	25.02	21.68	23.41	25.52	19.26	29.9
3	CNS	23.31	23.5	21.47	20.54	25.54	19.25	27.96
3	CNS	22.43	23.35	21.59	20.23	25.51	19.04	26.91
4	CNS	24.59	24.47	23.77	22.41	25.85	19.23	31.1
4	CNS	24.29	24.31	23.97	22.67	25.97	19.25	30.99
4	CNS	24.31	24.08	23.19	22.41	26.01	19.41	30.95
5	CNS	25.29	24.65	21.89	21.36	26.5	20.58	29.67
5	CNS	25.09	25.09	21.67	21.27	26.45	20.36	29.6
5	CNS	25.25	24.93	21.7	21.62	26.48	20.27	29.38
6	CNS	24.33	24.33	21.75	21.89	27.16	20.26	31.26
6	CNS	24.32	24.5	21.6	21.86	26.76	20.07	31.09
6	CNS	24.21	24.35	21.53	21.4	27.03	20.36	31.8
1	Foot	25.18	25.1	22.45	22.24	27.24	20.79	26.77
1	Foot	25.29	25.24	22.55	22.31	27.62	20.48	28.43
1	Foot	25.26	25.05	22.64	22.36	27.39	20.02	26.83
2	Foot	23.04	20.75	21.06	21.85	26.61	19.01	28.66
2	Foot	22.72	21.03	20.55	21.93	26.59	18.78	30.51
2	Foot	23.11	20.88	20.71	22.27	26.21	19.16	28.89
3	Foot	29	29.01	25.35	25.18	29.47	21.47	29.33
3	Foot	29	28.89	25.27	25.33	29.91	21.22	30.24
3	Foot	28.8	29.11	25.5	25.66	28.24	21.84	26.3
4	Foot	31.28	28.9	26.2	29.75	25.66	19.9	31.37
4	Foot	28.97	27.69	26.49	28.41	25.7	19.8	31.29
4	Foot	29.1	27.22		28.28	25.64	19.67	31.76
5	Foot	27.35	25.45		27.51	27.08	21.76	30.92
5	Foot	26.86	25.43	24.37	26.77	27	21.29	30.56
5	Foot	26.58	25.27	24.48	26.28	27.18	20.72	30.7
6	Foot	31.26	31.28	30.08	32.6	26.21	20.42	30.91
6	Foot	30.54	30.15	30.08	31.69	26.23	20.42	30.68
6	Foot	30.41	32.75	30.09	33.15	26.03	20.7	30.77
1	Lips	23.4	23.84	21.82	21.75	26.27	20.56	26.97
1	Lips	23.25	24.31	20.69	22.74	26.72	20.59	28.56
1	Lips	24.19	24.19	21.51	22.7	26.05	20.2	29.13
2	Lips	22.51	22.63	21.02	21.49	24.49	18.08	28.29
2	Lips	22.76	22.66	20.68	21.33	24.18	17.54	27.28
2	Lips	22.69	23.37		21.38	24.38	18.05	28.11
3	Lips	25.41	25.57	22.36	23.27	25.23	18.41	29.79
3	Lips	25.22	24.57		22.9	26.28	18.38	29.82
3	Lips	25.02	24.86	25.16	22.61	26.04	18.31	27.17
4	Lips	24.11	24.51	22.21	21.54	25.86	19.19	32.21
4	Lips	23.64	24.5	21.99	21.44	26.04	19.23	31.33
4	Lips	23.89	24.12	23.76	21.34	25.83	18.95	32.36
5	Lips	24.33	24.32	20.81	21.22	27.01	20.07	32.41
5	Lips	24.15	24.44	20.67	21.08	27	20	31.55
5	Lips	24.38	24.36	20.36	20.86	26.64	20.01	32.73
6	Lips	23.71	23.73	20.24	20.45	26.28	19.56	31.99
6	Lips	23.72	23.61	20.18	20.53	26.42	19.55	32.49
6	Lips	23.65	23.57	20.03	20.57	26.83	19.54	31.14
1	Mantle	27.3	27.23	26.07	24.64	29.42	20.47	27.96
1	Mantle	27.6	27.55	26.21	24.52	29.51	20.38	27.4
1	Mantle	28.04	27.83	25.81	24.35	28.35	20.4	26.07
2	Mantle	29.79	26.12	26.19	25.83	30.23	19.65	30.03
2	Mantle	28.87	26.44	25.59	25.98	29	19.52	32.03
2	Mantle	28.49	26.08	25.9	25.76	25.86	19.19	27.54
3	Mantle	23.57	23.51	18.92	19.43	24.97	18.08	28.46
3	Mantle	23.24	23.48	19.2	19.78	25.16	18.36	28.81
3	Mantle	23.54	23.34	19.22	20.17	25.08	18.35	27.37
4	Mantle	29.95	26.07	31.81	24.32	27.51	20.37	33.96
4	Mantle	29.17	27.45	29.72	24.85	27.29	20.44	34.29
4	Mantle	29.07		29.35	24.38	27.17	20.78	33.93
5	Mantle	28.73	26.11	28.54	24.45	27.12	20.44	31.55
5	Mantle	28.88		27.77	32.58	27.17	21.19	31.78
5	Mantle	28.44	26.07	28.24	28.21	26.99	20.97	31.18
6	Mantle	24.31	25.21	23.59	24.1	25.66	19.35	31.76
6	Mantle	25.22	23.12	22.1	24.28	25.64	19.39	31.33
6	Mantle	25.34	26.39	22.9	24.47	25.78	19.39	32.09
1	Penis	24.39	23.64	21.62	22.46	26.61	20.7	30.6
1	Penis	23.69	23.97	21.11	23.87	27.02	20.52	27.4
1	Penis	23.43	23.64	21.44	22.33	26.45	20.22	27.67
2	Penis	23.31	23.14	22.51	22.15	27.71	20.69	29.63
2	Penis	23.11			22.18	26.22	20.42	30.79
2	Penis	23.43	23.81	21.16	22.82	27.04	20.56	29.06
3	Penis	24.34	23.63	22.39	23.92	29.34	21.98	30.8
3	Penis	24.14	23.73	21.6	21.88	30	21.6	31.28
3	Penis	23.65	23.76	21.67	21.89	29.77	21.88	28.44
4	Penis	27.89	24.62	22.58	22.08	27.2	20.14	34.01
4	Penis	26.24	24.3	22.21	22.09	27.12	20.4	34.11
4	Penis	26.77	24.21	22.7	21.91	27.22	20.03	34.06
5	Penis	25.84	24.94	22.92	22.91	26.62	20.35	32.07
5	Penis	25.69	25.13	22.76	22.7	26.79	20.54	31.81
5	Penis	26.15	25.07	23.15	22.91	26.61	20.37	31.35
6	Penis	28.48	27.75	25.29	25.31	27.27	19.71	34.14
6	Penis	28.7	27.45	25.11	25.28	27.21	19.54	33.47
6	Penis	28.33	27.49	25.05	25.48	27.43	19.73	35.13
1	Tentacles	23.11	24.23	21.08	22.12	27.7	20.06	26.8
1	Tentacles		25.59		23.78	28.42	20.16	27.44
1	Tentacles	23.67	24.38	21.22		27.52	19.58	25.51
2	Tentacles	23.04	22.76	20.55	21.8	29.14	22.39	28.39
2	Tentacles	22.87	22.79	20.61	21.82	28.64	22.05	26.67
2	Tentacles	23.02	23.12	22.83	22.11	26.66	22.62	29.68
3	Tentacles	23.3	23.57			26.25	19.63	26.01
3	Tentacles	23.17	26	20.22	22.06	26.3	19.59	31.14
3	Tentacles	23.39	25.45	20.17	21.83	26.19	19.32	25.95
4	Tentacles	26.86	26.87	20.45	20.12	28.45	20.29	33.22
4	Tentacles	26.95	26.18	20.83	19.64	28.2	20.28	34.24
4	Tentacles	26.77	25.9	20.44	19.94	28.37	19.84	33.24
5	Tentacles	28.17	27.5	25.13	25.82	26.68	20.79	31.08
5	Tentacles	28.03	27.61	24.44	25.94	26.67	20.23	31.66
5	Tentacles	28.26	27.45	24.98	26.02	26.68	19.92	31.18
6	Tentacles	24.33	24.77	21.55	22.17	27.22	20.65	33.55
6	Tentacles	24.74	24.54	21.35	22.26	26.92	20.37	33.03
6	Tentacles	24.21	24.27	21.54	22.12	27.17	20.63	33.07
